# Supplementary material
Source: PubMed Central journal article supplement (PMC7289515)

Supplementary Figure 1

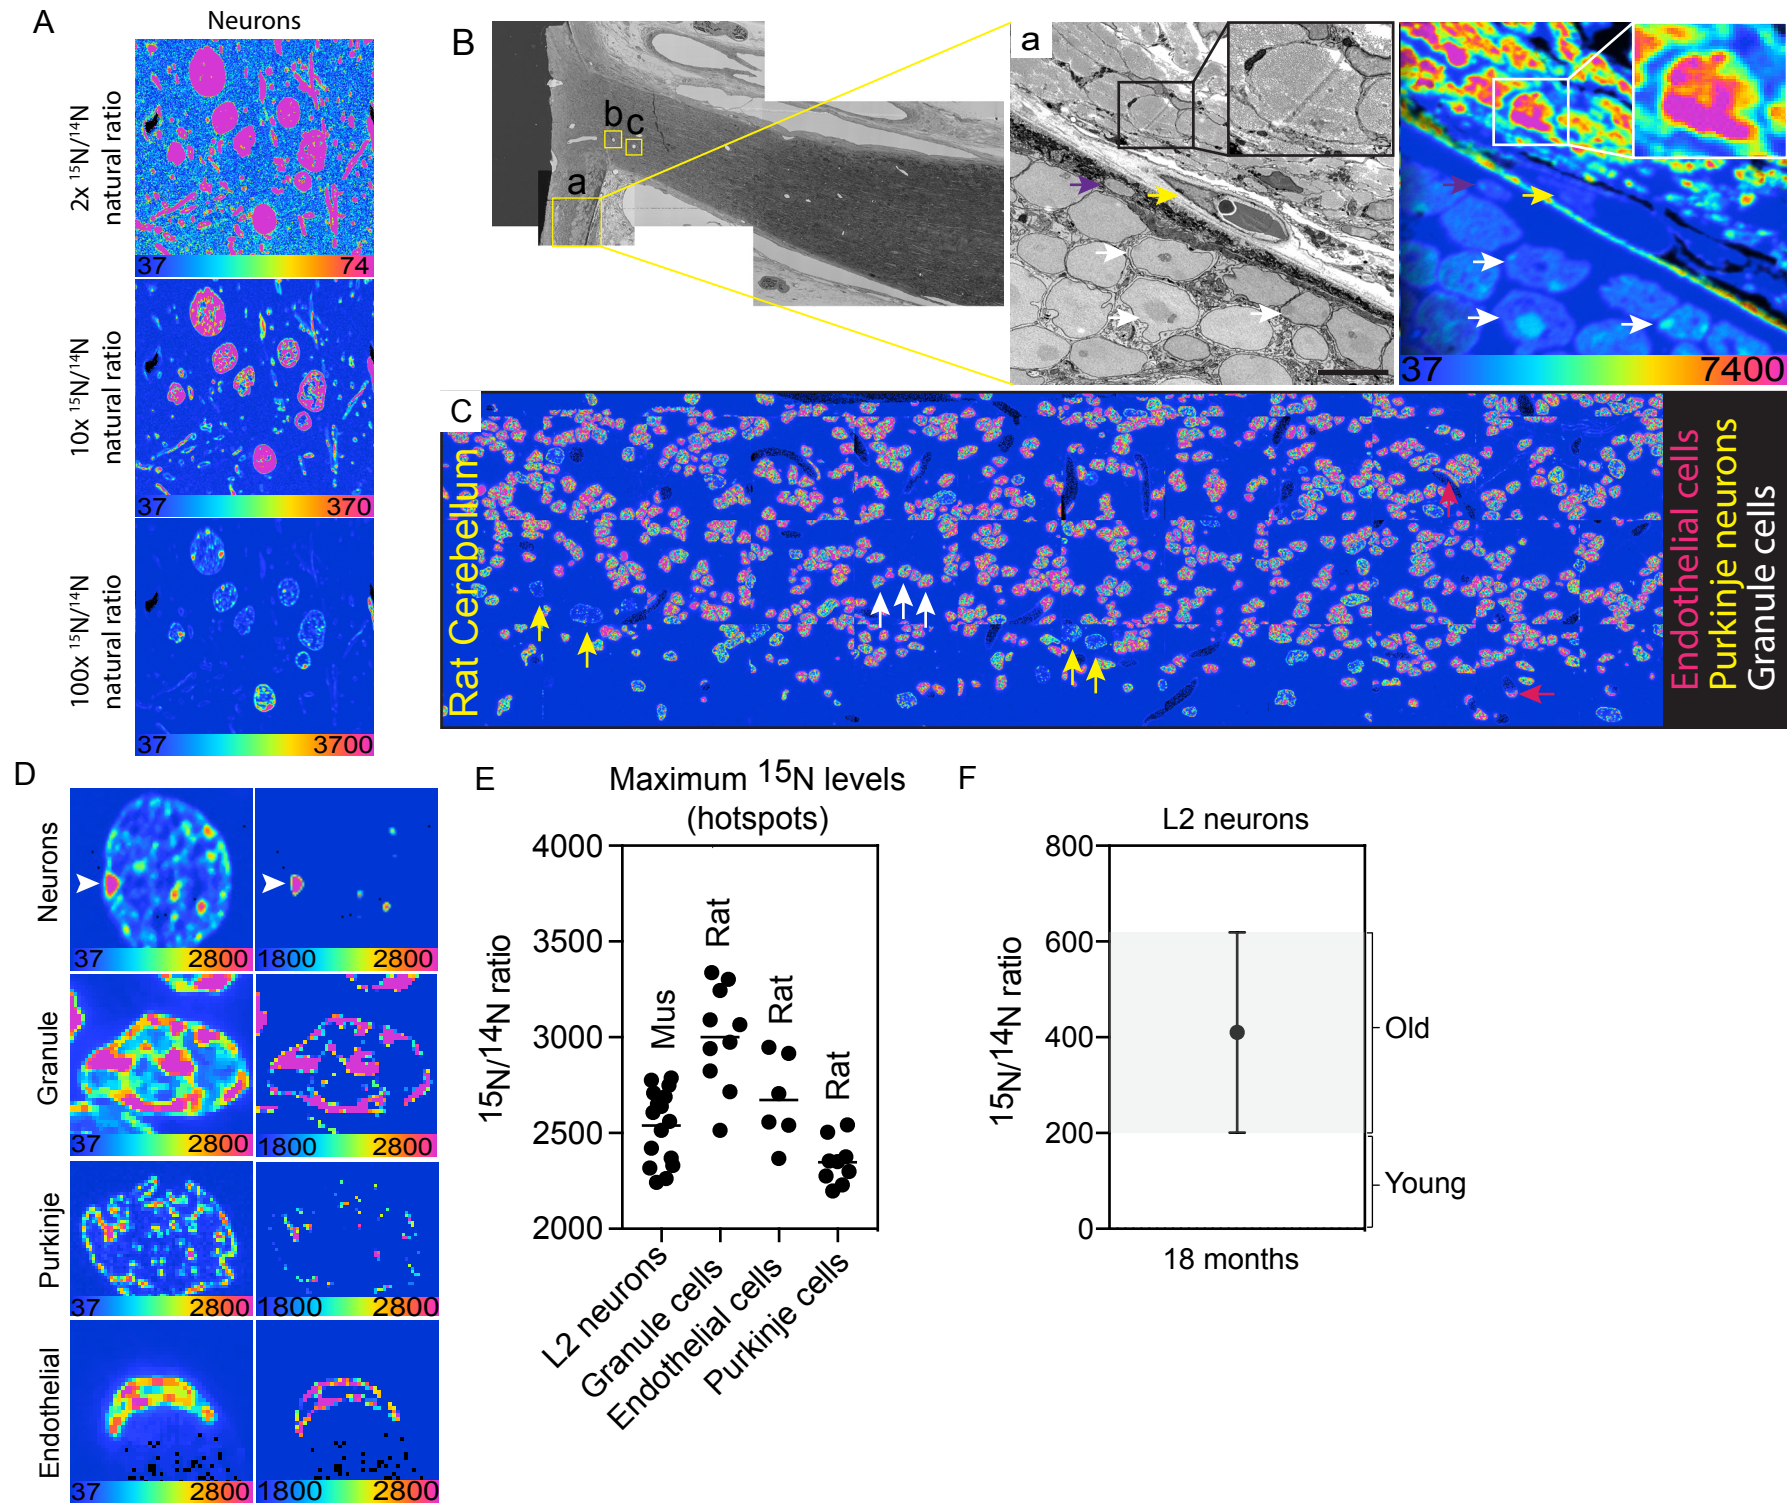

Supplement: NIHMS1576358-supplement-Figure_1.pdf [file NIHMS1576358-supplement-Figure_1.pdf]

Supplementary Figure 2

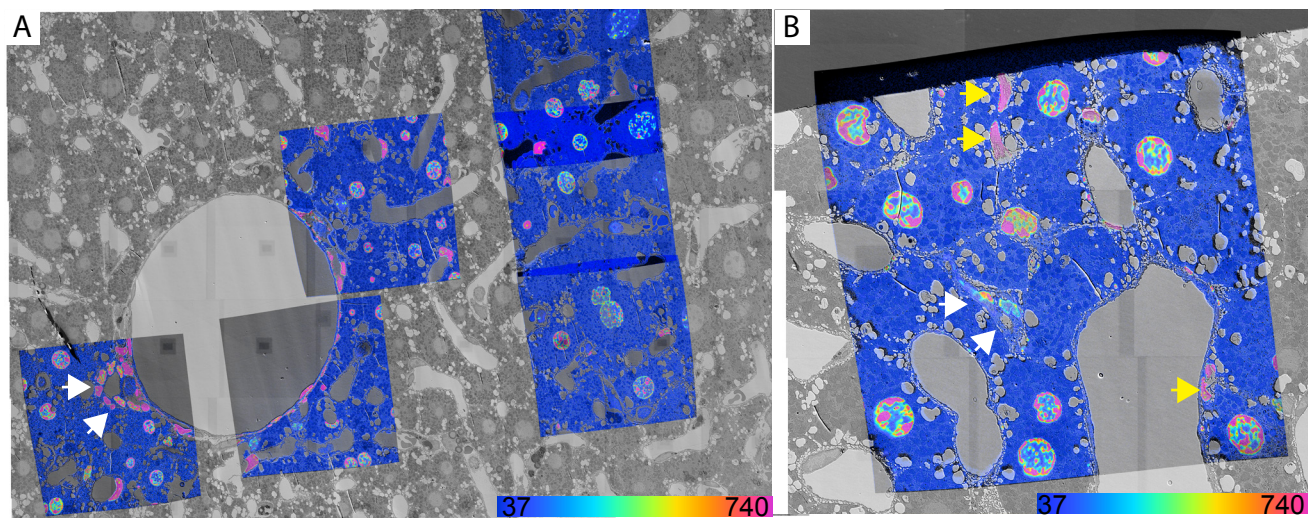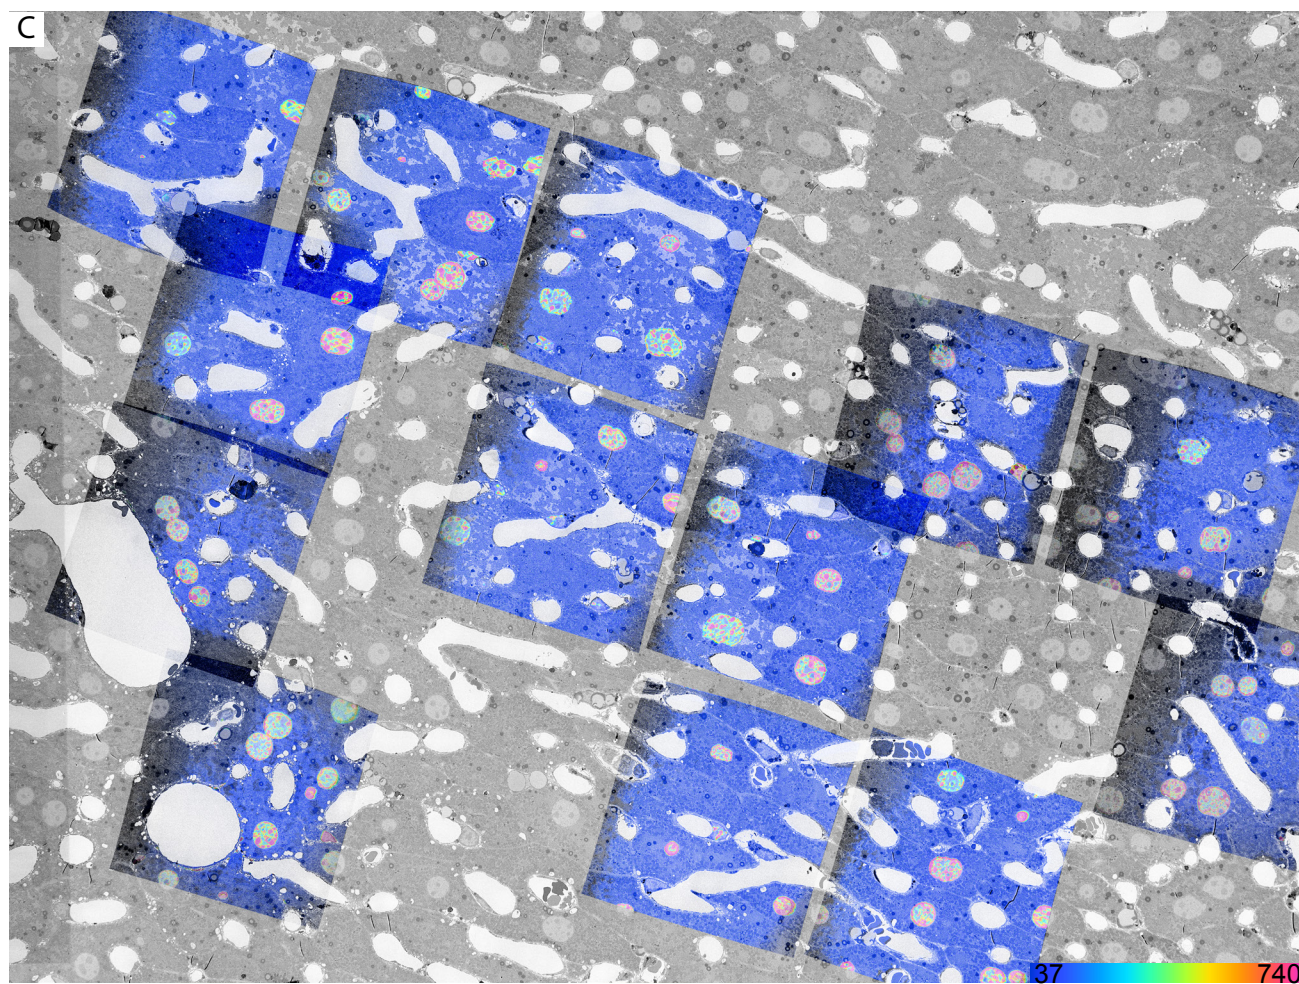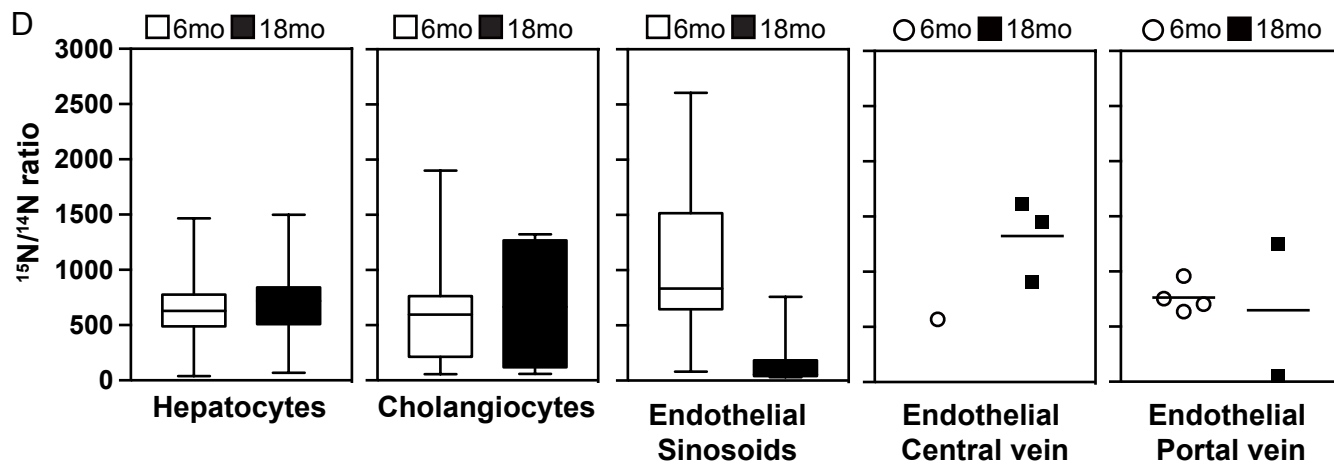

Supplement: NIHMS1576358-supplement-Figure_2.pdf [file NIHMS1576358-supplement-Figure_2.pdf]

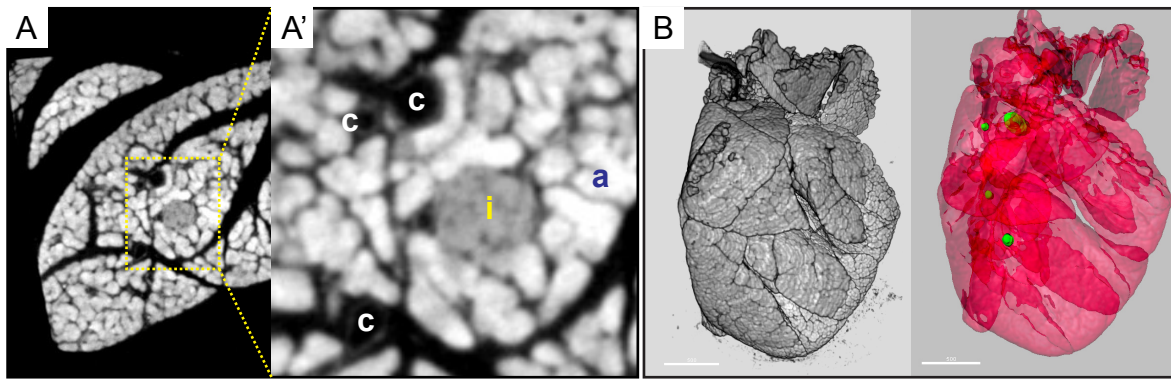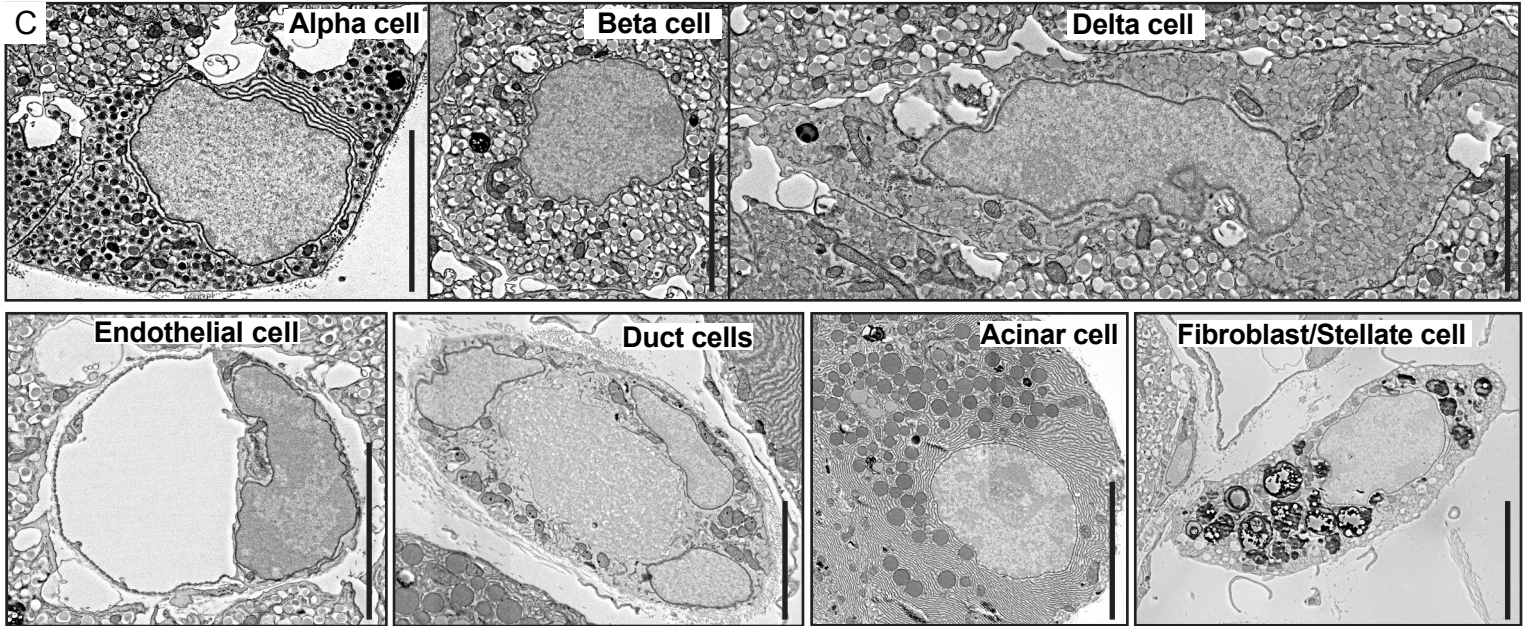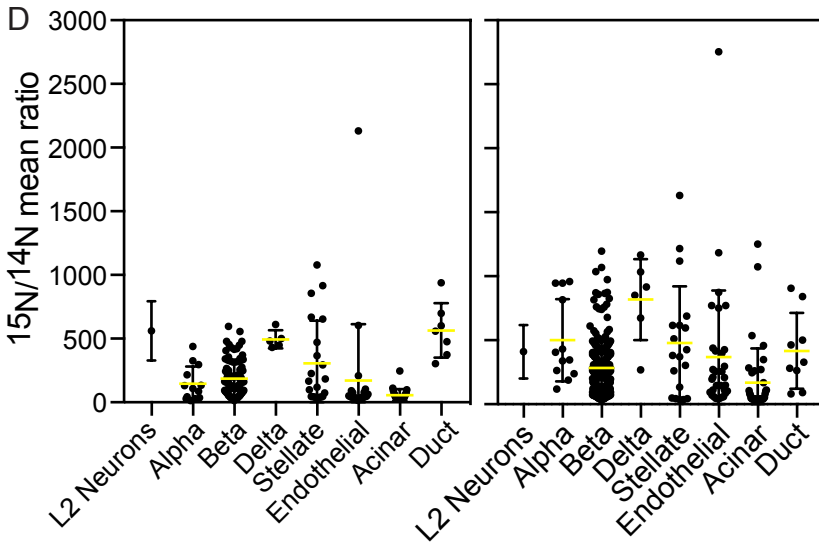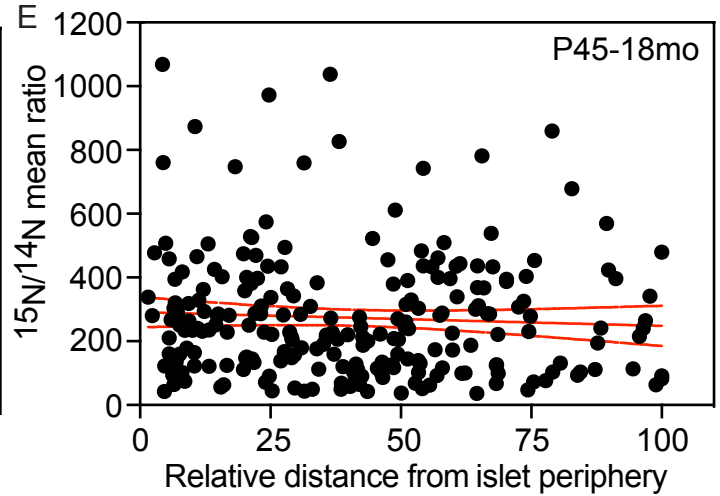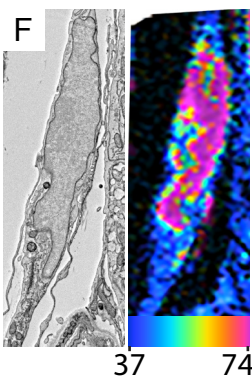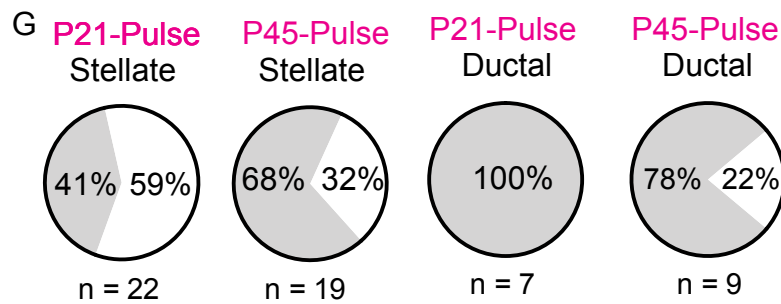

Supplement: NIHMS1576358-supplement-Figure_3.pdf [file NIHMS1576358-supplement-Figure_3.pdf]

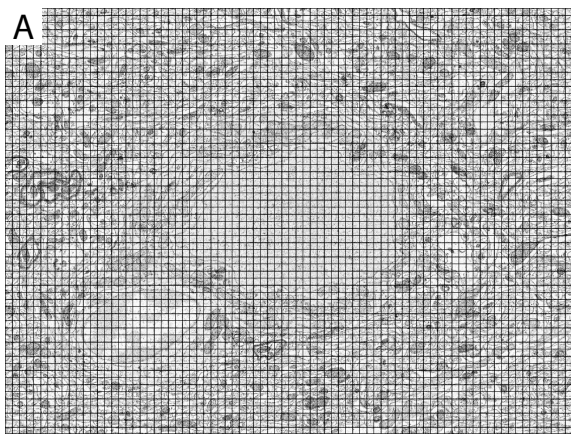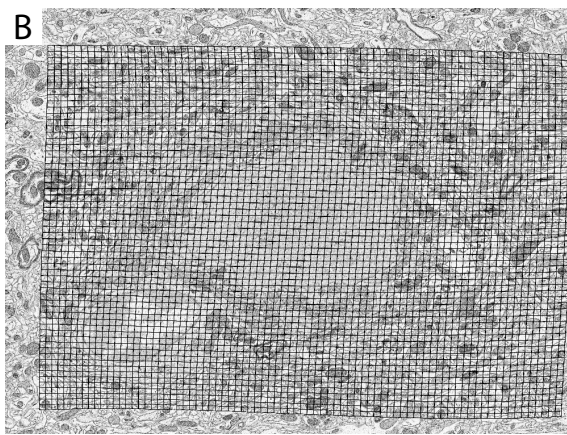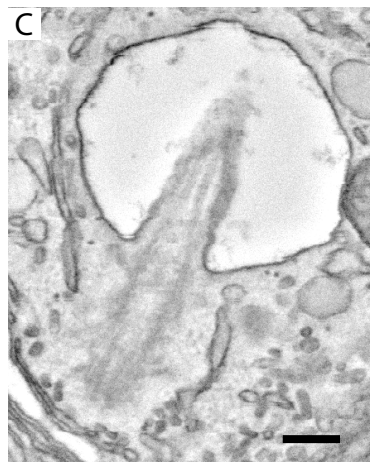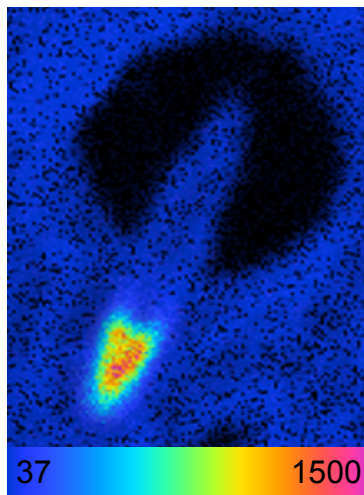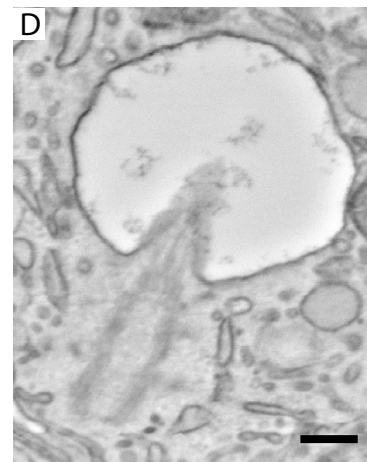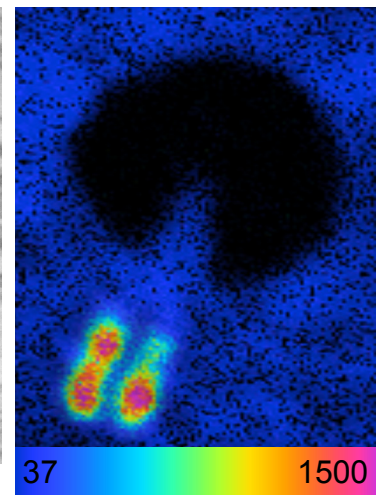

Supplementary Figure 4

Supplement: NIHMS1576358-supplement-Figure_4.pdf [file NIHMS1576358-supplement-Figure_4.pdf]
